# Supplementary material for: Long-Term Exposure to Traffic-Related Air Pollution Associated with Blood Pressure and Self-Reported Hypertension in a Danish Cohort
Source: PubMed Central journal article supplement (PMC3295339; doi:10.1289/ehp.1103631), 2012-01-03
Supplement: ehp.1103631.s001.pdf [file ehp.1103631.s001.pdf]

## **Supplement Material**

Long-term Exposure to Traffic-Related Air Pollution, Blood Pressure and Self-Reported Hypertension in a Danish Cohort

Mette Sørensen, Barbara Hoffmann, Martin Hvidberg, Matthias Ketzel, Steen Solvang Jensen, Zorana Jovanovic Andersen, Anne Tjønneland, Kim Overvad, Ole Raaschou-Nielsen

### **Table of Contents**

|                    |        |
|--------------------|--------|
| SoundPLAN          | page 2 |
| References         | page 2 |
| Supplement Table 1 | page 3 |
| Supplement Table 2 | page 5 |

## **SoundPLAN**

This noise calculation program implements the joint Nordic prediction method for road traffic noise, which has been the standard method for noise calculation in Scandinavia during many years (Bendtsen 1999; Danish EPA and Danish Road Directorate 1998). The input variables were: 1) geographical coordinates and height of each dwelling over terrain, 2) road lines with information on annual average daily traffic, traffic composition, traffic speed and road type (motorway, rural highway, road wider than 6 m, and other road), 3) building polygons. We assumed that the terrain was flat, which is a reasonable assumption in Denmark, and that urban areas, roads, and areas with water were hard surfaces whereas all other areas were acoustically porous. No information was available on noise barriers. Road traffic noise was calculated as  $L_{Aeq}$  at the most exposed façade of the dwelling at each enrolment address for the day (07:00-19:00 h), evening (19:00-22:00 h) and night (22:00-07:00 h) and expressed as  $L_{den}$ .

## **References**

- Bendtsen H. 1999. The Nordic prediction method for road traffic noise. *Sci Total Environ* 235:331-338.
- Danish EPA Danish Road Directorate. 1998. Beregningsmodel for vejtrafikstøj, revideret 1996. rapport nr 178.

**Supplement table 1** Associations between concentrations of NO<sub>2</sub> and NO and traffic at the residence and the systolic and diastolic blood pressure at enrolment

| <b>Exposure</b>                                                    | <b>N</b> | <b>Differences in systolic blood pressure (mm Hg) (95% confidence interval)<sup>a</sup></b> | <b>Differences in diastolic blood pressure (mm Hg) (95% confidence interval)<sup>a</sup></b> |
|--------------------------------------------------------------------|----------|---------------------------------------------------------------------------------------------|----------------------------------------------------------------------------------------------|
| <b>NO<sub>2</sub> 5-year mean (µg/m<sup>3</sup>)<sup>b,c</sup></b> |          |                                                                                             |                                                                                              |
| < 14.0                                                             | 11,109   | 0.00                                                                                        | 0.00                                                                                         |
| 14.0 – 15.6                                                        | 11,109   | -0.30 (-0.82; 0.23)                                                                         | 0.00 (-0.27; 0.28)                                                                           |
| 15.6 – 20.5                                                        | 11,109   | -0.34 (-0.93; 0.26)                                                                         | -0.15 (-0.47; 0.16)                                                                          |
| > 20.5                                                             | 11,109   | -0.86 (-1.59; -0.13)                                                                        | -0.36 (-0.75; 0.02)                                                                          |
| Linear trend per doubling                                          | 44,436   | -1.00 (-1.64; -0.37)                                                                        | -0.53 (-0.86; -0.19)                                                                         |
| <b>NO<sub>2</sub> 1-year mean (µg/m<sup>3</sup>)<sup>b,c</sup></b> |          |                                                                                             |                                                                                              |
| < 14.2                                                             | 11,116   | 0.00                                                                                        | 0.00                                                                                         |
| 14.2 – 16.3                                                        | 11,102   | -0.36 (-0.91; 0.18)                                                                         | 0.01 (-0.28; 0.29)                                                                           |
| 16.3 – 20.4                                                        | 11,109   | -0.43 (-1.04; 0.18)                                                                         | -0.20 (-0.52; 0.13)                                                                          |
| > 20.4                                                             | 11,109   | -0.95 (-1.68; -0.23)                                                                        | -0.43 (-0.81; -0.04)                                                                         |
| Linear trend per doubling                                          | 44,436   | -1.21 (-1.87; -0.54)                                                                        | -0.55 (-0.90; -0.20)                                                                         |
| <b>NO<sub>2</sub>, 3-days mean<sup>b,d</sup></b>                   |          |                                                                                             |                                                                                              |
| < 10.7                                                             | 5,360    | 0.00                                                                                        | 0.00                                                                                         |
| 10.7-13.5                                                          | 5,419    | -0.93 (-1.64; -0.21)                                                                        | -0.41 (-0.79; -0.03)                                                                         |
| 13.5-17.5                                                          | 5,353    | -1.26 (-2.00; -0.53)                                                                        | -0.76 (-1.15; -0.37)                                                                         |
| > 17.5                                                             | 5,375    | -0.78 (-1.53; -0.04)                                                                        | -0.16 (-0.56; 0.23)                                                                          |
| Linear trend per doubling                                          | 21,507   | -0.69 (-1.22; -0.17)                                                                        | -0.28 (-0.56; -0.00)                                                                         |
| <b>NO 5-year mean (µg/m<sup>3</sup>)<sup>b,c</sup></b>             |          |                                                                                             |                                                                                              |
| < 2.9                                                              | 11,109   | 0.00                                                                                        | 0.00                                                                                         |
| 2.9 – 4.0                                                          | 11,109   | -0.24 (-0.76; 0.27)                                                                         | -0.12 (-0.36; 0.16)                                                                          |
| 4.0 – 9.1                                                          | 11,109   | -0.57 (-1.14; 0.01)                                                                         | -0.52 (-0.82; -0.21)                                                                         |
| > 9.1                                                              | 11,109   | -0.87 (-1.57; -0.17)                                                                        | -0.55 (-0.92; -0.18)                                                                         |
| Linear trend per doubling                                          | 44,436   | -0.28 (-0.46; -0.09)                                                                        | -0.14 (-0.23; -0.04)                                                                         |
| <b>NO 1-year mean (µg/m<sup>3</sup>)<sup>b,c</sup></b>             |          |                                                                                             |                                                                                              |
| < 2.8                                                              | 11,116   | 0.00                                                                                        | 0.00                                                                                         |
| 2.8 – 3.6                                                          | 11,102   | -0.36 (-0.89; 0.16)                                                                         | -0.07 (-0.34; 0.21)                                                                          |
| 3.6 – 7.9                                                          | 11,109   | -0.55 (-1.15; 0.04)                                                                         | -0.39 (-0.70; -0.07)                                                                         |
| > 7.9                                                              | 11,109   | -0.67 (-1.42; 0.03)                                                                         | -0.38 (-0.77; 0.00)                                                                          |
| Linear trend per doubling                                          | 44,436   | -0.25 (-0.44; -0.07)                                                                        | -0.12 (-0.22; -0.02)                                                                         |
| <b>NO, 3-days mean<sup>b,d</sup></b>                               |          |                                                                                             |                                                                                              |
| < 3.8                                                              | 5,360    | 0.00                                                                                        | 0.00                                                                                         |
| 3.8-6.0                                                            | 5,419    | -0.65 (-1.35; 0.06)                                                                         | -0.28 (-0.66; 0.09)                                                                          |
| 6.0-10.3                                                           | 5,353    | -0.42 (-1.16; 0.31)                                                                         | -0.15 (-0.54; 0.24)                                                                          |
| > 10.3                                                             | 5,375    | -0.83 (-1.63; -0.04)                                                                        | -0.39 (-0.81; 0.04)                                                                          |
| Linear trend per doubling                                          | 21,507   | -0.25 (-0.54; 0.04)                                                                         | -0.13 (-0.28; 0.03)                                                                          |

***Supplement Table 1 continued***

<sup>a</sup> Adjusted for age, sex, centre, calendar-year, area, smoking status, BMI, length of school attendance, municipality SES, alcohol intake, intake of fruit and vegetables, physical activity, traffic noise, season, temperature and humidity

<sup>b</sup> The cut-off points between exposure groups were the 25<sup>th</sup>, 50<sup>th</sup> and 75<sup>th</sup> percentiles for all participants at the time of inclusion into the cohort

<sup>c</sup> Time-weighted average concentration of NO<sub>2</sub> /NO at residences 1 and 5 years preceding enrolment

<sup>d</sup> Based only on participants from the Copenhagen centre. The analysis of the 3-days mean of NO<sub>2</sub> /NO was also adjusted by the preceding 1-year mean concentration of NO<sub>2</sub> /NO

**Supplement Table 2** Associations between NO<sub>2</sub> and NO and traffic at the residence and risk for prevalent and incident hypertension

| Exposure                                                | Hypertension at baseline <sup>a</sup> |                                                   | Hypertension at follow-up |                                                             |
|---------------------------------------------------------|---------------------------------------|---------------------------------------------------|---------------------------|-------------------------------------------------------------|
|                                                         | N cases                               | Odds Ratio (95% confidence interval) <sup>b</sup> | N cases                   | Incidence rate ratio (95% confidence interval) <sup>c</sup> |
| NO <sub>2</sub> 5-year mean (µg/m <sup>3</sup> )<br>d,e |                                       |                                                   |                           |                                                             |
| < 13.1                                                  | 1359                                  | 1.00                                              | 798                       | 1.00                                                        |
| 13.1 – 15.1                                             | 2016                                  | 0.98 (0.91-1.07)                                  | 799                       | 1.07 (0.96-1.19)                                            |
| 15.1 – 19.6                                             | 2161                                  | 0.96 (0.87-1.05)                                  | 799                       | 1.08 (0.96-1.22)                                            |
| > 19.6                                                  | 2665                                  | 0.97 (0.87-1.08)                                  | 799                       | 0.99 (0.91-1.14)                                            |
| Linear trend per doubling                               | 8201                                  | 0.93 (0.85-1.01)                                  | 3195                      | 1.00 (0.88-1.14)                                            |
| NO <sub>2</sub> 1-year mean (µg/m <sup>3</sup> )<br>d,e |                                       |                                                   |                           |                                                             |
| < 11.5                                                  | 103                                   | 0.84 (0.67-1.05)                                  | 799                       | 1.00                                                        |
| 11.5 – 14.5                                             | 2061                                  | 1.00                                              | 798                       | 0.93 (0.83-1.05)                                            |
| 14.5 – 18.8                                             | 2787                                  | 0.94 (0.87-1.01)                                  | 800                       | 0.97 (0.86-1.09)                                            |
| > 18.8                                                  | 3250                                  | 0.98 (0.90-1.07)                                  | 798                       | 0.90 (0.78-1.05)                                            |
| Linear trend per doubling                               | 8201                                  | 0.91 (0.83-1.00)                                  | 3195                      | 0.97 (0.87-1.08)                                            |
| NO 5-year mean (µg/m <sup>3</sup> ) <sup>d,e</sup>      |                                       |                                                   |                           |                                                             |
| < 2.7                                                   | 832                                   | 1.00                                              | 799                       | 1.00                                                        |
| 2.7 – 3.6                                               | 2506                                  | 0.97 (0.89-1.07)                                  | 798                       | 1.06 (0.95-1.18)                                            |
| 3.6 – 7.9                                               | 2631                                  | 0.97 (0.87-1.07)                                  | 800                       | 0.99 (0.88-1.12)                                            |
| > 7.9                                                   | 2232                                  | 0.92 (0.81-1.03)                                  | 798                       | 1.03 (0.90-1.19)                                            |
| Linear trend per doubling                               | 8201                                  | 0.98 (0.95-1.00)                                  | 3195                      | 1.01 (0.97-1.05)                                            |
| NO 1-year mean (µg/m <sup>3</sup> ) <sup>d,e</sup>      |                                       |                                                   |                           |                                                             |
| < 2.6                                                   | 1253                                  | 1.00                                              | 798                       | 1.00                                                        |
| 2.6 – 3.4                                               | 2131                                  | 0.91 (0.84-0.99)                                  | 800                       | 1.12 (1.01-1.24)                                            |
| 3.4 – 6.8                                               | 2561                                  | 0.92 (0.84-1.01)                                  | 799                       | 1.06 (0.94-1.19)                                            |
| > 6.8                                                   | 2256                                  | 0.90 (0.81-1.01)                                  | 798                       | 1.11 (0.97-1.26)                                            |
| Linear trend per doubling                               | 8201                                  | 0.98 (0.95-1.00)                                  | 3195                      | 1.02 (0.98-1.06)                                            |

<sup>a</sup> Defined as cohort participants who in the baseline questionnaire answered that they suffered from hypertension

<sup>b</sup> Adjusted for age, sex, centre, calendar-year, area, smoking status, BMI, length of school attendance, municipality SES, alcohol intake, intake of fruit and vegetables, physical activity, traffic noise, season, temperature and humidity

<sup>c</sup> Stratified by gender and calendar year and adjusted for smoking status, BMI, length of school attendance, municipality SES, area, alcohol intake, intake of fruit and vegetables, physical activity and traffic noise

<sup>d</sup> Time-weighted average concentration of NO<sub>x</sub> at residences for 1 and 5 years preceding hypertension/censoring

<sup>e</sup> The cut-off points between exposure groups were the 25<sup>th</sup>, 50<sup>th</sup> and 75<sup>th</sup> percentiles for the follow-up cases at the time of diagnosis
